# Supplementary material
Source: Springer Nature journal article supplement (https://www.springermedizin.de/resource/supplementary/12943_2013_1333_MOESM15_ESM.pdf/9552728)
Supplement: MOESM15 [file 9552728]

**Additional File 15: *miR-15a/16-1* cluster TaqMan® microRNA and primary precursor expression assays utilized, including Normalization references**

| miRNA Name   | Species | Sequence                                                                                        | Location                         | miRBase Accession no. | Type                |
|--------------|---------|-------------------------------------------------------------------------------------------------|----------------------------------|-----------------------|---------------------|
| miR-16       | Human   | UAGCAGCACGUAAAUAUUGGCG                                                                          | Chr.13: 50623109 - 50623197 [-]  | MI0000070             | Target              |
| miR-16-1*    | Human   | CCAGUAUUAAACUGUGCUGCUGA                                                                         | Chr.13: 50623109 - 50623197 [-]  | MI0000070             | Target              |
| miR-15a      | Human   | UAGCAGCACAUAAUGGUUUGUG                                                                          | Chr.13: 50623255 - 50623337 [-]  | MI0000069             | Target              |
| miR-15a*     | Human   | CAGGCCAUUUUGUGCUGCCUCA                                                                          | Chr.13: 50623255 - 50623337 [-]  | MI0000069             | Target              |
| miR-16-2*    | Human   | CCAAUAUUACUGUGCUGCUUUA                                                                          | Chr.3: 160122533 - 160122613 [+] | MI0000115             | Target              |
| miR-15b      | Human   | UAGCAGCACAUCAUGGUUUACA                                                                          | Chr.3: 160122376 - 160122473 [+] | MI0000438             | Target              |
| miR-15b*     | Human   | CGAAUCAUUUUUGUGCUCUCUA                                                                          | Chr.3: 160122376 - 160122473 [+] | MI0000438             | Target              |
| miR-26b      | Human   | UUCAAGUAAUUCAGGAUAGGU                                                                           | Chr.2: 219267369 - 219267445 [+] | MI0000084             | Reference           |
| RNU44        | Human   | CCTGGATGATGATAGCAAATGCTGA<br>CTGAACATGAAGGTCTTAATTAGCT<br>CTAACTGACT                            | Synthetic RNA construct          |                       | Reference           |
| PRI-miR-15a  | Human   | CCUUGGAGUAAAGUAGCAGCACA<br>UAAUGGUUUGUGGAUUUUGAAA<br>AGGUGCAGGCCAUUUUGUGCUGC<br>CUCAAAAAUACAAGG | Chr. 13: 50623255-50623337 [-]   | MI0000069             | Stem-loop<br>Target |
| PRI-miR-16-2 | Human   | GUUCCACUCUAGCAGCACGUAAA<br>AUUGGCGUAGUGAAAUAUAUU<br>AAACACCAUAUUACUGUGCUGCU<br>UUAGUGUGAC       | Chr.3: 160122533-160122613 [+]   | MI0000115             | Stem-loop<br>Target |
